# Supplementary material for: Odor-regulated oviposition behavior in an ecological specialist
Source: PubMed Central journal article supplement (PMC10219952; doi:10.1038/s41467-023-38722-z), 2023-05-26
Supplement: 41467_2023_38722_MOESM1_ESM.pdf [file 41467_2023_38722_MOESM1_ESM.pdf]

## **Supplementary Information**

### **Odor-regulated oviposition behavior in an ecological specialist**

Raquel Álvarez-Ocaña, Michael P. Shahandeh, Vijayaditya Ray,  
Thomas O. Auer, Nicolas Gompel and Richard Benton

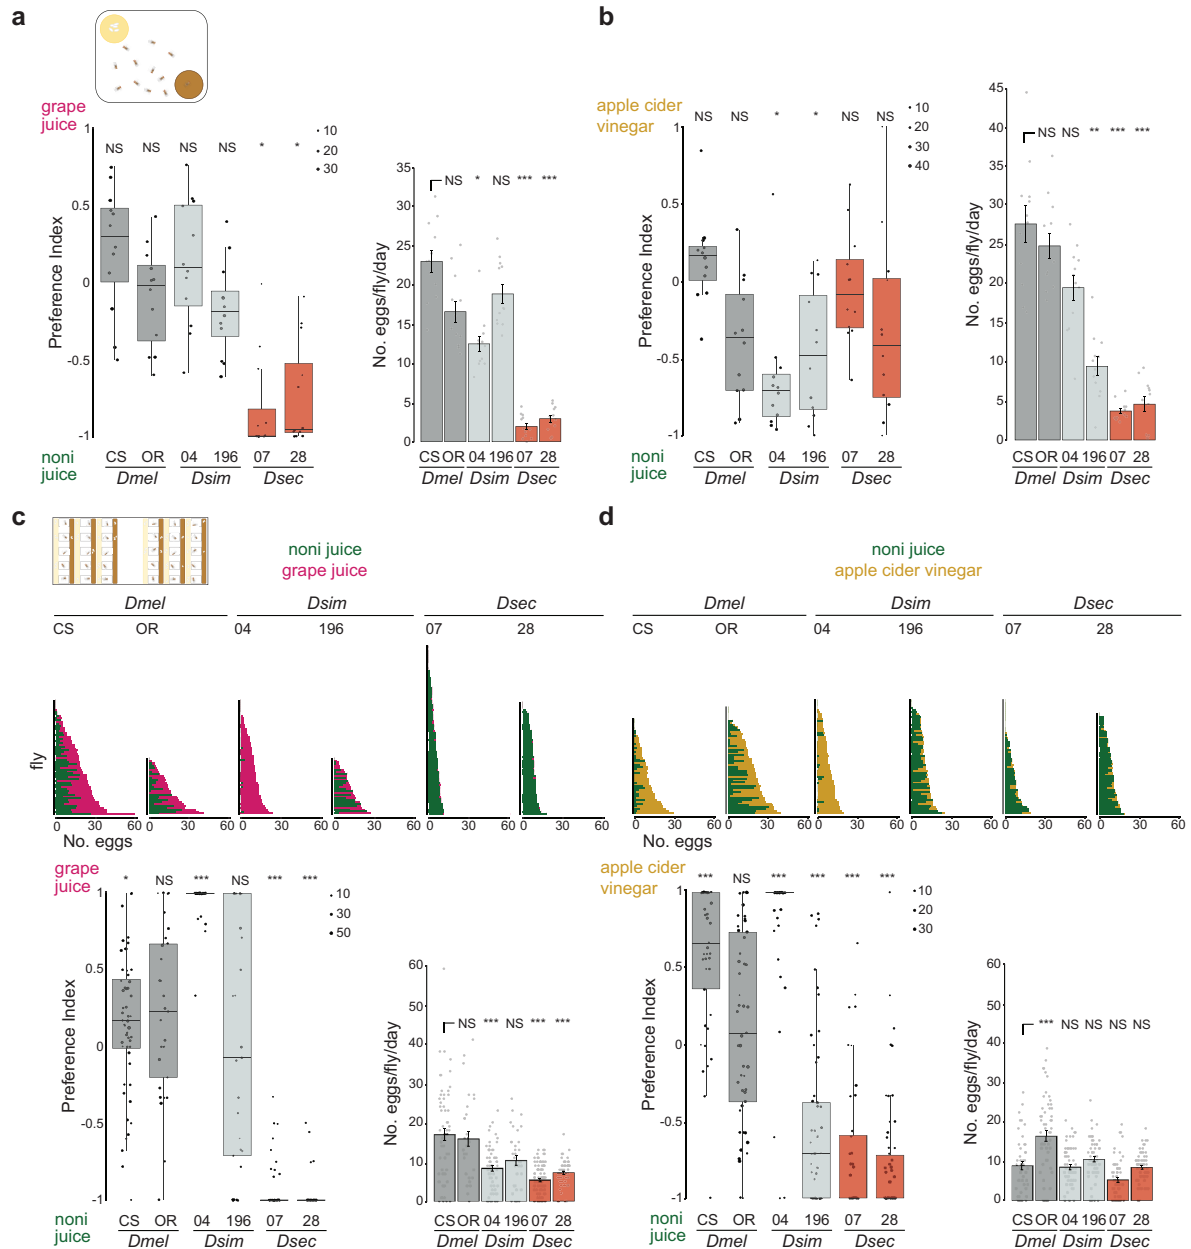

**Supplementary Figure 1. Oviposition preference assays using instant medium-based substrates.**

**a** Group oviposition preference assays for noni juice versus grape juice in instant medium using the same strains as in Fig. 1c. Left: box plots of oviposition preference index. Statistically-significant differences from 0 (no preference) are indicated (as in Fig. 1c);  $N = 12$  (representing 4 assays of 40-80 flies, each scored on 3 successive days with fresh oviposition plates each day). Right: bar plots of egg-laying rate. Mean values  $\pm$  standard error of the mean (SEM) are shown in these and all other bar plots. Statistically-significant differences from the *D. melanogaster* Canton-S (CS) strain are indicated (as in Fig. 1c).

**b** Group oviposition preference assay, as in **a**, for noni juice versus apple cider vinegar;  $N = 12$  (representing 4 assays of 40-80 flies, each scored on 3 successive days with fresh oviposition plates each day).

**c** Single-fly oviposition preference assay for noni juice versus grape juice in instant medium for the same strains as in **a**. Top: total number of eggs laid in each

substrate by each female. Bottom left: oviposition preference index. Bottom right: egg-laying rate.

**d** Single-fly oviposition preference assays, as in **c**, for noni juice versus apple cider vinegar;  $N = 43-60$  flies across 2 technical replicates.

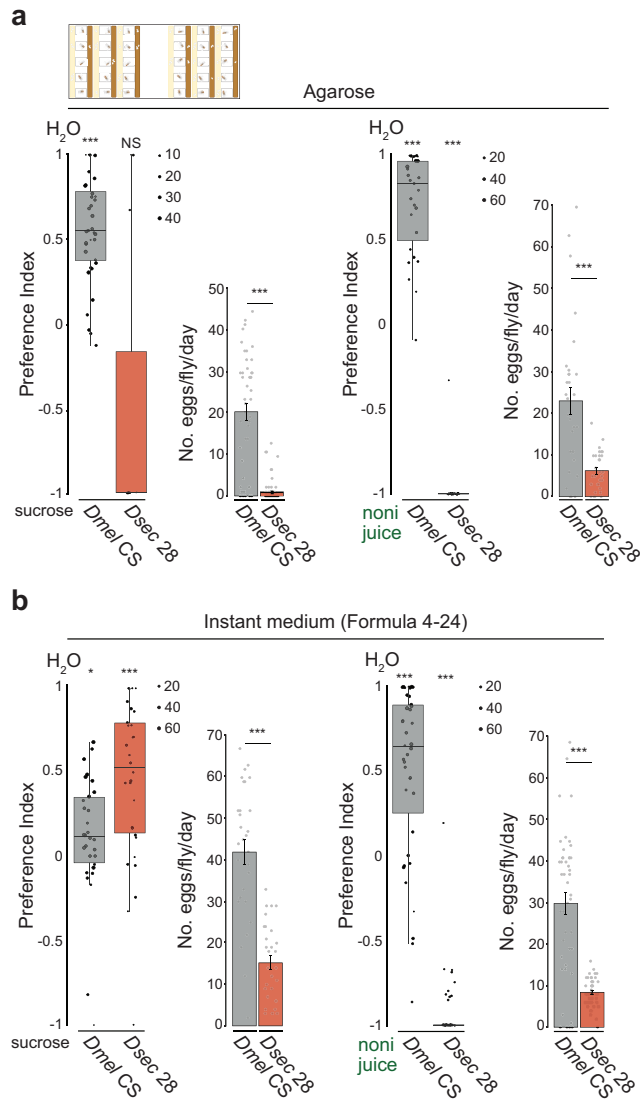

### Supplementary Figure 2. Establishment of single-fly oviposition assays.

**a** Single-fly oviposition preference assays testing H<sub>2</sub>O versus either 150 mM sucrose or noni juice in agarose. For the box-plots of oviposition preference index, statistically-significant differences from 0 (no preference) are indicated: \*\*\*  $P < 0.001$ ; \*  $P < 0.05$ ; NS (not significant)  $P > 0.05$  (Wilcoxon test with Bonferroni correction for multiple comparisons);  $N = 30-45$  flies across 1-2 technical replicates. Preference of *D. melanogaster* for the plain substrate resembles previous observations<sup>1</sup>. Bar plots of egg-laying rate indicate mean values  $\pm$  SEM. Statistical comparisons between genotypes are shown: \*\*\*  $P < 0.001$  (two-sample t-test).

**b** Single-fly oviposition preference assays, as in **a**, using instant medium instead of agarose;  $N = 30-45$  flies across 1-2 technical replicates. The higher egg-laying rate of both species on instant medium compared to agarose substrates might reflect differences in chemical composition, texture and/or moistness. Most experiments were performed using simpler agarose substrates, to minimize interference with responses to complex stimuli (i.e., juices). However, instant medium substrates were used in most single-odor experiments, as egg-laying rate was very low on agarose substrates with single chemical stimuli, especially for *D. sechellia* strains.



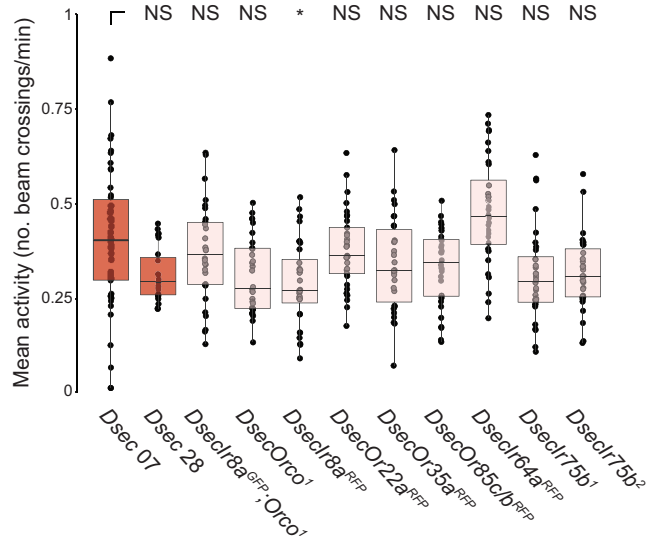

**Supplementary Figure 3. Locomotor activity of olfactory receptor mutants.** Mean activity of the indicated *D. sechellia* strains represented by the number of beam crossings per minute per fly recorded over 3 complete 12 h light: 12 h dark cycles. Statistically-significant differences from *Dsec 07* (the genetic background strain for all mutants) are indicated: \*  $p < 0.05$ ; NS  $P > 0.05$  (Wilcoxon test with Bonferroni correction for multiple comparisons);  $N = 23-46$  flies per genotype across at least 2 technical replicates.

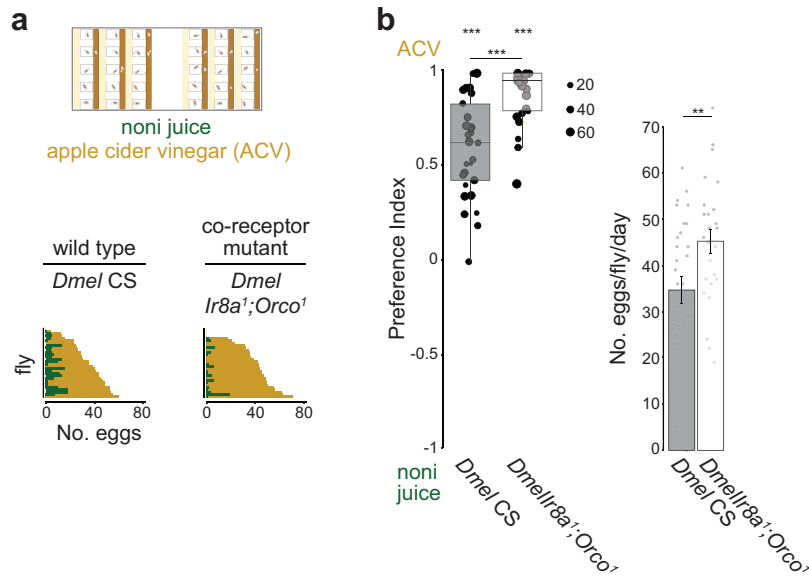

**Supplementary Figure 4. Near-anosmic *D. melanogaster* do not display defects in oviposition behavior.**

**a** Single-fly oviposition preference assays for apple cider vinegar versus noni juice in agarose for the wild-type *D. melanogaster* Canton-S (CS) and near-anosmic *Dmel**Ir8a*<sup>1</sup>;*Orco*<sup>1</sup> mutants. The plots show the number of eggs laid per fly;  $N = 26$ - $29$  flies across 1 technical replicate.

**b** Left: oviposition preference index for the assays shown in **a**. Statistically-significant differences from 0 (no preference) are indicated: \*\*\*  $P < 0.001$  (Wilcoxon test with Bonferroni correction for multiple comparisons). The two genotypes are statistically-significantly different:  $P = 6.334 \times 10^{-5}$  (Wilcoxon test with Bonferroni correction). Right: egg-laying rate. The two strains are statistically-significantly different: \*\*  $P < 0.01$  (Kruskal-Wallis rank sum test with Nemenyi post-hoc test). Note, however, that as the *Ir8a*<sup>1</sup>;*Orco*<sup>1</sup> mutant is not in the CS genetic background, it is unclear if the slight increase in preference for apple cider vinegar and in egg-laying rate in the mutant strain reflects a function for these olfactory co-receptors or an effect of genetic background.

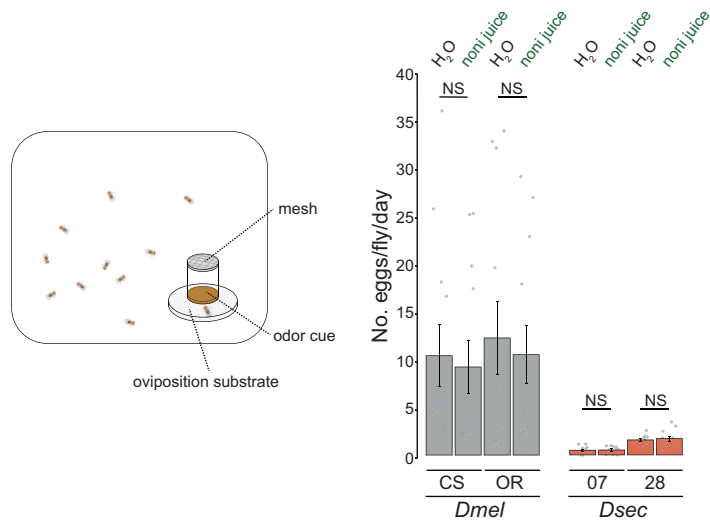

**Supplementary Figure 5. Noni odor cues are not sufficient to promote egg-laying behavior.**

Left: schematic of the one-choice group oviposition assay in the presence of a non-accessible noni juice source or H<sub>2</sub>O control. Agarose plates supplemented with 150 mM sucrose were provided as oviposition substrates. Right: egg-laying rate. No statistically-significant differences between the conditions were observed: NS  $P > 0.05$  (Kruskal-Wallis rank sum test with Nemenyi post-hoc test);  $N = 12$  (representing 4 assays, each scored on 3 successive days with fresh oviposition plates each day).

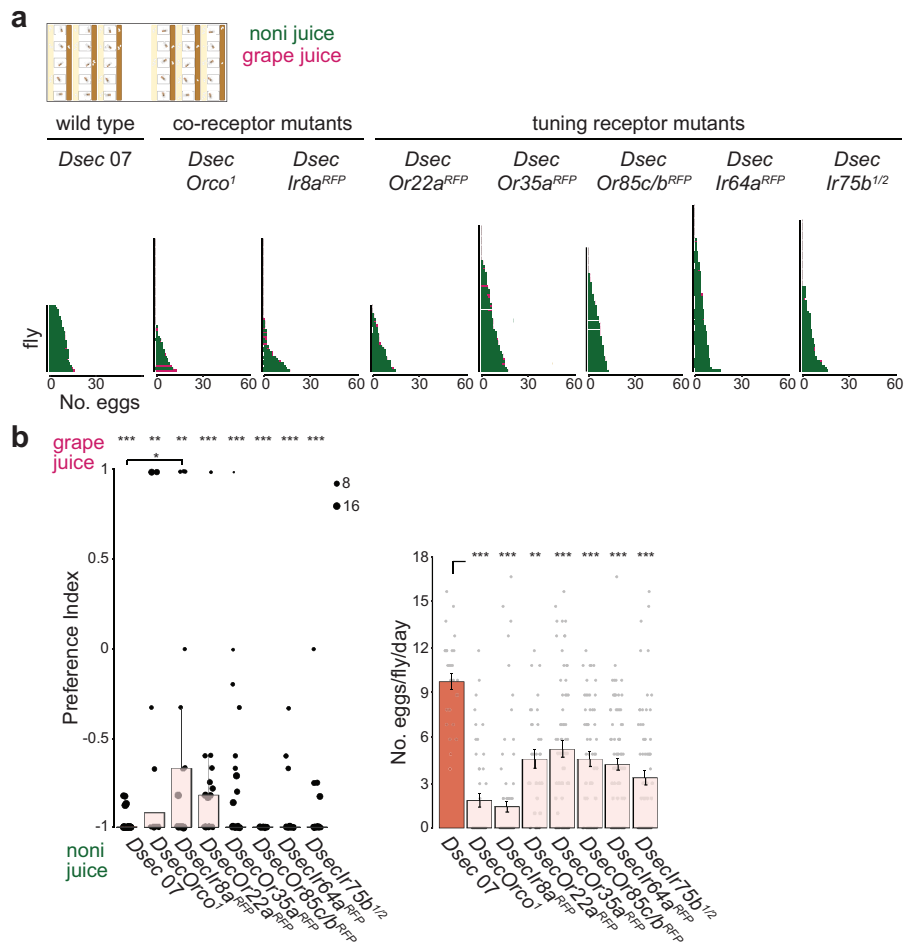

### Supplementary Figure 6. Olfactory pathways required for *D. sechellia* oviposition.

**a** Single-fly oviposition preference assays for noni juice versus grape juice in agarose for the indicated genotypes. The plots show the number of eggs laid per fly;  $N = 30-60$  flies across 1-2 technical replicates.

**b** Single-fly oviposition assay for the same strains and conditions as in **a**. Left: oviposition preference index. Statistically-significant differences from 0 (no preference) are indicated: \*\*\*  $P < 0.001$ ; \*\*  $P < 0.01$ ; \*  $P < 0.05$  (Wilcoxon test with Bonferroni correction for multiple comparisons);  $N = 30-60$  flies, 1-2 assays. *Dsec 07* and *Dsec Ir8a<sup>RFP</sup>* show a statistical difference:  $P = 0.0223$  (Wilcoxon test with Bonferroni correction). Right: egg-laying rate in these assays. \*\*\*  $P < 0.001$ ; \*\*  $P < 0.01$  (Kruskal-Wallis rank sum test with Nemenyi post-hoc test).

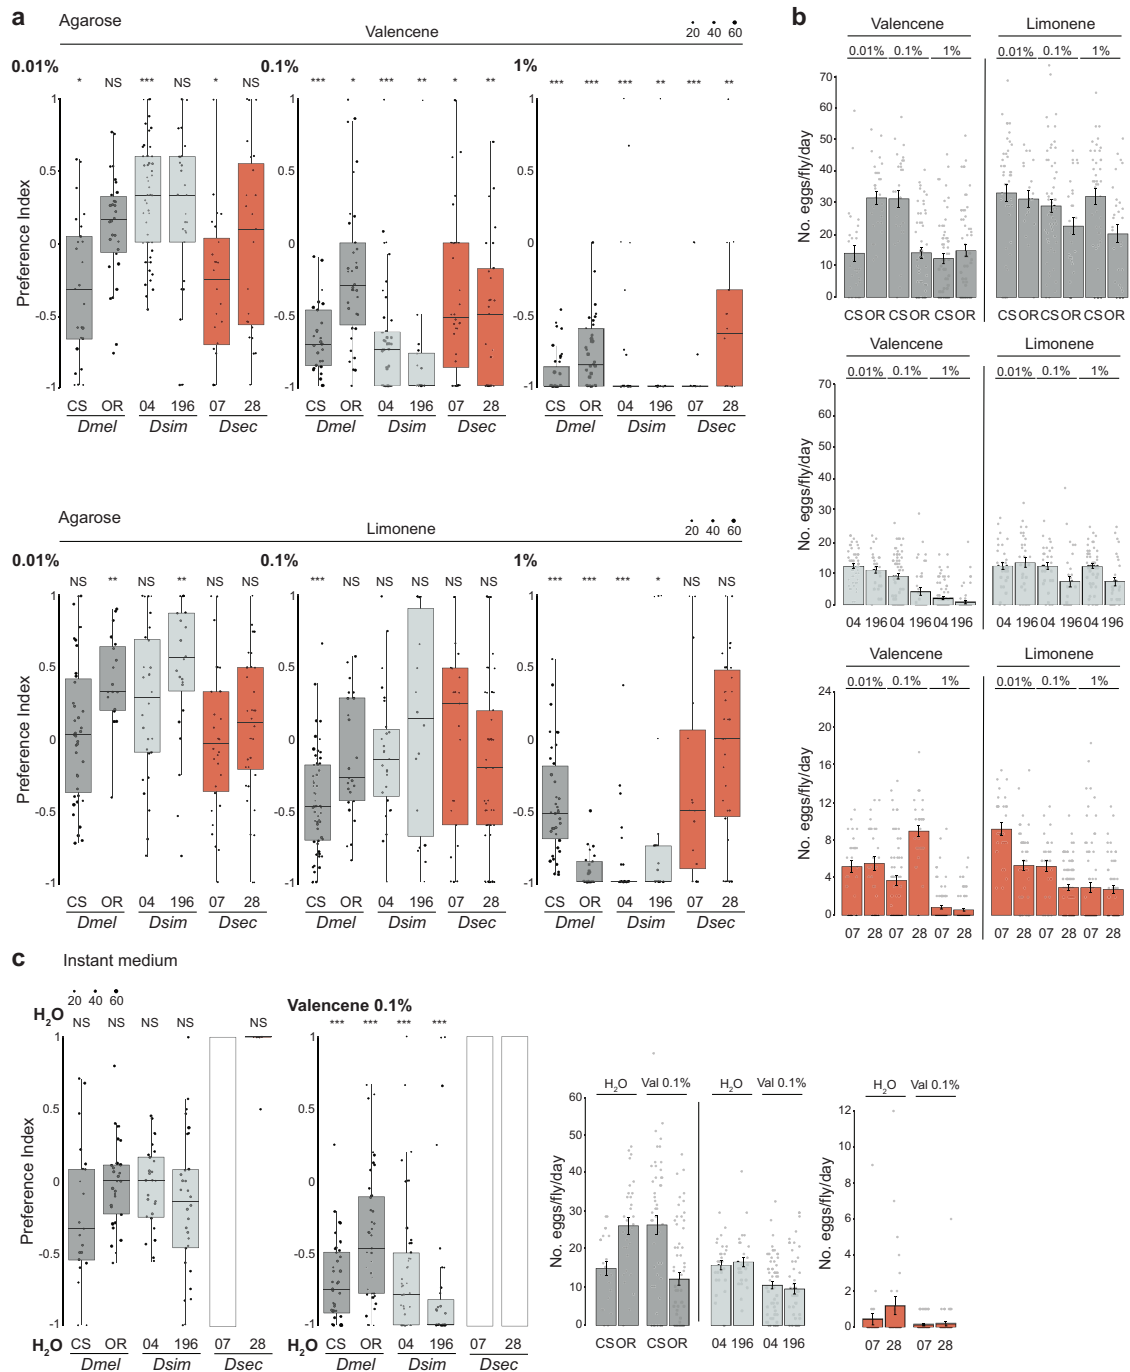

### Supplementary Figure 7. Influence of valencene and limonene on oviposition behavior.

**a** Single-fly oviposition assays for valencene and limonene at the indicated concentrations. Odors were diluted in apple cider vinegar (for *D. melanogaster* and *D. simulans*) or noni juice (for *D. sechellia*) and agarose. For further information about fly strains and statistical analyses, see the legend to Fig. 1c. Statistically-significant differences from 0 (no preference) are indicated: \*\*\*  $P < 0.001$ ; \*\*  $P < 0.01$ ; \*  $P < 0.05$ ; NS  $P > 0.05$  (Wilcoxon test with Bonferroni correction for multiple comparisons);  $N = 30-90$  flies across 1-3 technical replicates.

**b** Bar plots of egg-laying rates for flies in the assays in **a**.

**c** Single-fly oviposition assays of the same strains as in **a**, with an instant medium substrate. Left: oviposition preference index in control (H<sub>2</sub>O versus H<sub>2</sub>O) or

experimental (0.1% valencene versus H<sub>2</sub>O) conditions. Statistically-significant differences from 0 (no preference) are indicated: \*\*\*  $P < 0.001$ ; NS  $P > 0.05$  (Wilcoxon test with Bonferroni correction for multiple comparisons);  $N = 30-60$  flies across 1-2 technical replicates. Right: egg-laying rate in these assays (Val = valencene). For some strains (indicated with a white rectangle), the low number of flies laying eggs prevented calculation of a preference index.

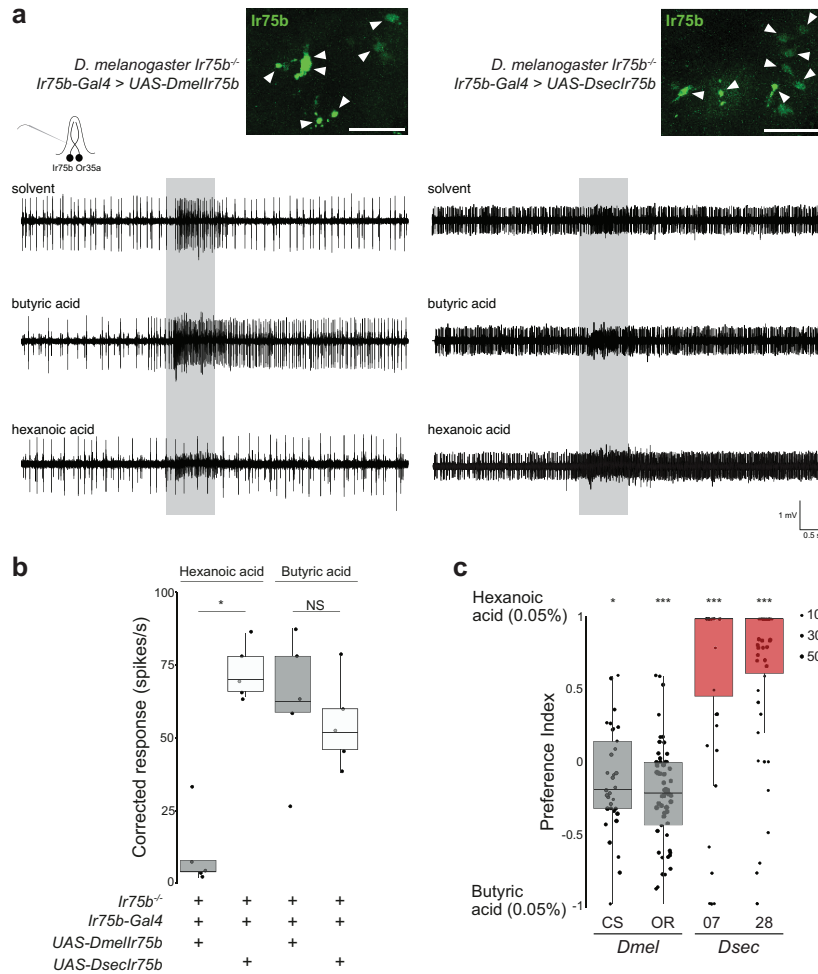

### Supplementary Figure 8. Validation of the expression and species-specific function of heterologously-expressed Ir75b variants.

**a** Top: immunohistochemistry for Ir75b on whole-mount antennae of flies expressing *D. melanogaster* or *D. sechellia* Ir75b in *D. melanogaster* Ir75b mutant neurons (see Fig. 6d for the full genotypes). Scale bars, 25  $\mu$ m. Although immunofluorescence signals of soma (arrowheads) were variable between neurons within an antenna – possibly reflecting the heterogeneous strength of the *Ir75b* promoter-Gal4 driver – they were comparable between the two genotypes. 5 and 6 antennae were examined for the *D. melanogaster* and *D. sechellia* Ir75b rescue genotypes, respectively. Bottom: representative traces of extracellular recordings from the same genotypes of neuronal responses in antennal sensilla housing Ir75b neurons (and Or35a neurons) to the indicated odors or solvent (H<sub>2</sub>O). The grey bars indicate the stimulus period (1 s).

**b** Quantification of odor-evoked electrophysiological responses of the indicated genotypes (see the legend to Fig. 6d for the full genotypes). Each dot represents a measurement from an independent olfactory sensillum. Statistically-significant differences are indicated. \*  $P < 0.05$ ; NS  $P > 0.05$  (pairwise Wilcoxon test with Bonferroni correction).

**c** Single-fly oviposition preference assays for hexanoic acid versus butyric acid in instant medium for the indicated wild-type strains of *D. melanogaster* and *D. sechellia*. Statistically-significant differences from 0 (no preference) are indicated. \*\*\*  $P < 0.001$ ; \*  $P < 0.05$  (Wilcoxon test with Bonferroni correction for multiple comparisons);  $N = 34$ -60 flies across 2 technical replicates.

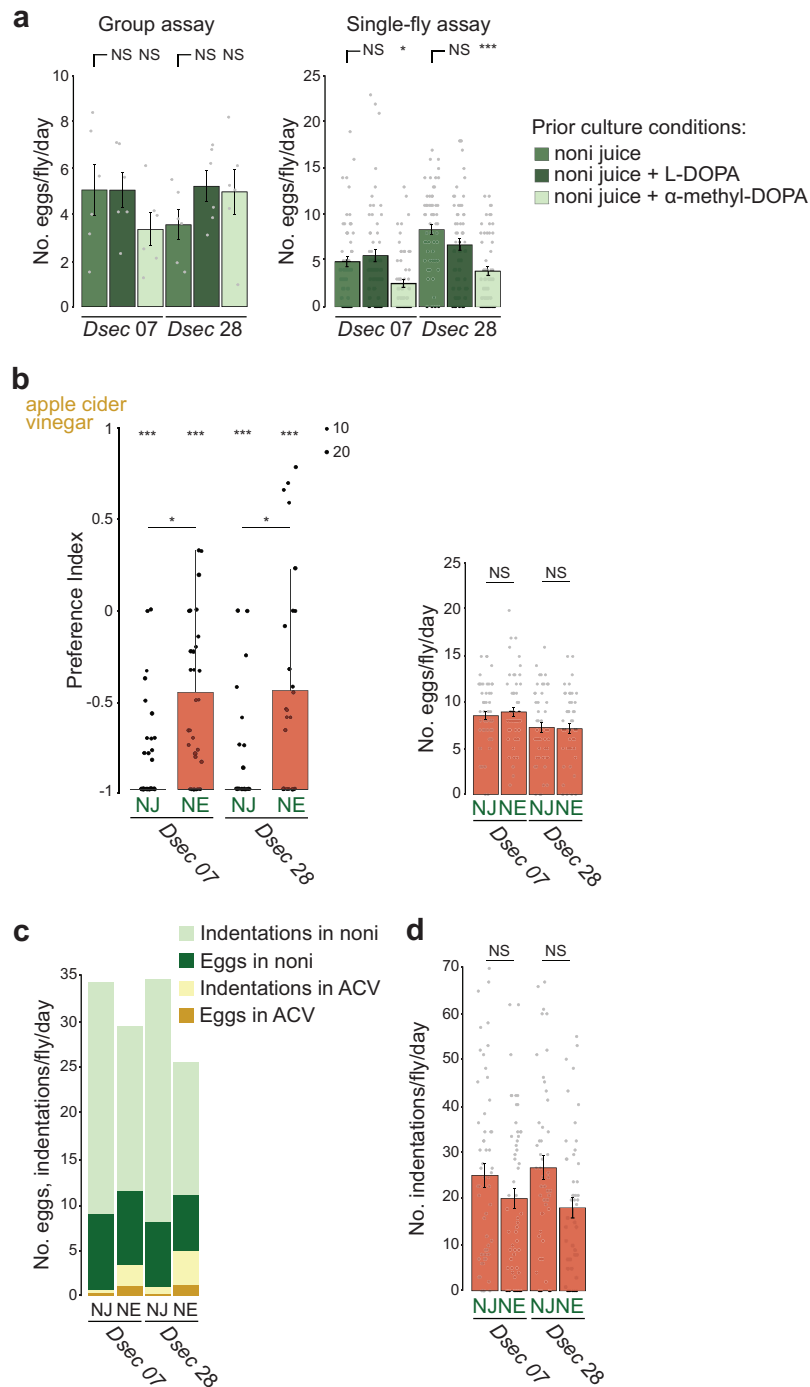

**Supplementary Figure 9. Impact of modulation of L-DOPA levels, and of fresh noni extract, on oviposition behavior of *D. sechellia*.**

**a** Egg-laying rate of flies that had been grown on control standard noni juice food or that supplemented with L-DOPA or  $\alpha$ -methyl-DOPA (see Methods). Left: group oviposition assays, representing 2 assays of either 10 (*D. melanogaster*) or 20 (*D. sechellia*) flies each, scored on 3 successive days with a fresh non-supplemented noni paste oviposition plate provided each day. Right: single-fly oviposition assays using noni paste as oviposition substrate on both sides of the chamber. Statistically-significant differences from flies grown on non-supplemented noni juice food are shown: \*\*\*  $P < 0.001$ ; \*  $P < 0.05$ ; NS  $P > 0.05$  (Kruskal-Wallis rank sum



test with Nemenyi post-hoc test);  $N = 60$  flies across 2 technical replicates.

**b** Single-fly oviposition preference assays for commercial noni juice (NJ) or fresh noni extract (NE) versus  $H_2O$  in agarose for the indicated wild-type strains of *D. sechellia*. Left: oviposition preference index. Statistically-significant differences from 0 (no preference) are indicated. \*\*\*  $P < 0.001$  (Wilcoxon test with Bonferroni correction for multiple comparisons). Statistically-significant differences exist between experimental conditions (NJ or NE) in both *Dsec 07* and *Dsec 28*: \*  $P < 0.05$  (pairwise Wilcoxon test with Bonferroni correction);  $N = 49-56$  flies across 2 technical replicates. Right: egg-laying rate. NS  $P > 0.05$  (Kruskal-Wallis rank sum test with Nemenyi post-hoc test).

**c** Rate and distribution of egg-laying and indentation formation of the flies in the assays in **b**.

**d** Rate of indentation formation observed in the experiments in **b**. No statistically-significant differences were observed between conditions: NS  $P > 0.05$  (Kruskal-Wallis rank sum test with Nemenyi post-hoc test).

**Supplementary Table 1. *Drosophila* strains.**

| Strain                                                         | Source                                        | Identifier      |
|----------------------------------------------------------------|-----------------------------------------------|-----------------|
| <i>D. melanogaster</i> wildtype Canton-S (CS)                  |                                               |                 |
| <i>D. melanogaster</i> wildtype Oregon-R (OR)                  |                                               |                 |
| <i>D. melanogaster</i> ovo <sup>D1</sup> v24 / Y / C(1)Dx, y f | Daniel Pauli                                  |                 |
| <i>D. melanogaster</i> Ir8a <sup>1</sup>                       | 2                                             | RRID:BDSC_41744 |
| <i>D. melanogaster</i> Orco <sup>1</sup>                       | 3                                             | RRID:BDSC_23130 |
| <i>D. melanogaster</i> Ir75b <sup>DsRed</sup>                  | 4                                             |                 |
| <i>D. melanogaster</i> Ir75b-Gal4                              | 5                                             |                 |
| <i>D. melanogaster</i> UAS-Dmellr75b                           | 5                                             |                 |
| <i>D. melanogaster</i> UAS-Dseclr75b                           | 5                                             |                 |
| <i>D. simulans</i> wildtype 04                                 | <i>Drosophila</i> Species Stock Center [DSSC] | 14021-0251.004  |
| <i>D. simulans</i> wildtype 196                                | DSSC                                          | 14021-0251.196  |
| <i>D. sechellia</i> wildtype 07                                | DSSC                                          | 14021-0248.07   |
| <i>D. sechellia</i> wildtype 28                                | DSSC                                          | 14021-0248.28   |
| <i>D. sechellia</i> Orco <sup>1</sup> (strong hypomorph)       | 6                                             |                 |
| <i>D. sechellia</i> Or22a <sup>RFP</sup>                       | 6                                             |                 |
| <i>D. sechellia</i> Or85c/b <sup>RFP</sup>                     | 6                                             |                 |
| <i>D. sechellia</i> Or35a <sup>RFP</sup>                       | 6                                             |                 |
| <i>D. sechellia</i> Ir8a <sup>GFP</sup>                        | 6                                             |                 |
| <i>D. sechellia</i> Ir8a <sup>RFP</sup>                        | 6                                             |                 |
| <i>D. sechellia</i> Ir64a <sup>RFP</sup>                       | 6                                             |                 |
| <i>D. sechellia</i> Ir75b <sup>1</sup>                         | 6                                             |                 |
| <i>D. sechellia</i> Ir75b <sup>2</sup>                         | 6                                             |                 |

**Supplementary Table 2. Chemicals.**

| Chemical                                                          | Supplier                           | CAS        |
|-------------------------------------------------------------------|------------------------------------|------------|
| Agarose                                                           | Promega                            | -          |
| Apple cider vinegar                                               | Migros                             | -          |
| BACTO Agar                                                        | BD                                 | 214010     |
| Balsamic vinegar                                                  | Antica Modena                      | -          |
| Butyric acid                                                      | Sigma-Aldrich                      | 107-92-6   |
| 3,4-dihydroxyphenylalanine (L-DOPA)                               | Sigma-Aldrich                      | 53587-29-4 |
| Formula 4-24® instant <i>Drosophila</i> medium ("instant medium") | Carolina Biological Supply Company | -          |
| Grape juice                                                       | Beutelsbacher Bio                  | -          |
| 2-heptanone                                                       | Sigma-Aldrich                      | 110-43-0   |
| Hexanoic acid                                                     | Sigma-Aldrich                      | 142-62-1   |
| Limonene                                                          | Sigma-Aldrich                      | 5989-27-5  |
| α-methyl-DOPA                                                     | Sigma-Aldrich                      | 41372-08-1 |
| Methyl hexanoate                                                  | Sigma-Aldrich                      | 106-70-7   |
| Noni juice                                                        | Raab Vitalfood Bio                 | -          |
| Octanoic acid                                                     | Sigma-Aldrich                      | 124-07-2   |
| Sucrose                                                           | Sigma-Aldrich                      | 57-50-1    |
| Valencene                                                         | Sigma-Aldrich                      | 4630-07-3  |

## Supplementary References

1. Gou B, Zhu E, He R, Stern U, Yang CH. High Throughput Assay to Examine Egg-Laying Preferences of Individual *Drosophila melanogaster*. *J Vis Exp*. e53716 (2016).
2. Abuin L, Bargeton B, Ulbrich MH, Isacoff EY, Kellenberger S, Benton R. Functional architecture of olfactory ionotropic glutamate receptors. *Neuron*. **69**, 44-60 (2011).
3. Larsson MC, Domingos AI, Jones WD, Chiappe ME, Amrein H, Vosshall LB. *Or83b* encodes a broadly expressed odorant receptor essential for *Drosophila* olfaction. *Neuron*. **43**, 703-714 (2004).
4. Mika K, *et al*. Olfactory receptor-dependent receptor repression in *Drosophila*. *Science Advances*. **7**, eabe3745 (2021).
5. Prieto-Godino LL, *et al*. Evolution of Acid-Sensing Olfactory Circuits in Drosophilids. *Neuron*. **93**, 661-676 e666 (2017).
6. Auer TO, *et al*. Olfactory receptor and circuit evolution promote host specialization. *Nature*. **579**, 402-408 (2020).
