# Supplementary material for: Odor-regulated oviposition behavior in an ecological specialist
Source: PubMed Central journal article supplement (PMC10219952; doi:10.1038/s41467-023-38722-z), 2023-05-26
Supplement: 41467_2023_38722_MOESM4_ESM.pdf [file 41467_2023_38722_MOESM4_ESM.pdf]

## **Description of Additional Supplementary Files:**

**Supplementary Movie 1.** Compilation of video sequences illustrating substrate touching by the ovipositor in *D. sechellia*.

**Supplementary Movie 2.** Compilation of video sequences illustrating substrate scratching by the ovipositor in *D. sechellia*.

**Supplementary Movie 3.** Compilation of video sequences illustrating substrate digging by the ovipositor in *D. sechellia*.

**Supplementary Movie 4.** Compilation of video sequences illustrating indentation formation by the ovipositor in *D. sechellia*.

**Supplementary Movie 5.** Compilation of video sequences illustrating egg laying by *D. sechellia*.
